# Supplementary material for: Towards Novel Nutritional Strategies in Gestational Diabetes: Eating Behaviour and Obesity in Women with Gestational Diabetes Compared with Non-Pregnant Adults
Source: MDPI journal article supplement (doi:10.3390/nu15194141), 2023-09-25
Supplement: s1 [file s1]

## Supplementary Materials

**Table S1.** Description of the three studies which were included in this analysis. Data are presented as mean (SD) or n(%) as appropriate.

|                                          | Baseline Data for Encapsulated Nutrients Study                                                                                             | Baseline Data for Personalised Weight Loss Study                                                                                           | Baseline Data for Dietary Intervention in Gestational Diabetes Study                                                                   |
|------------------------------------------|--------------------------------------------------------------------------------------------------------------------------------------------|--------------------------------------------------------------------------------------------------------------------------------------------|----------------------------------------------------------------------------------------------------------------------------------------|
| Study size                               | <i>n</i> = 43                                                                                                                              | <i>n</i> = 174                                                                                                                             | <i>n</i> = 200                                                                                                                         |
| Rationale                                | Attendance for study of gut hormones and potential weight loss intervention using encapsulated nutrients.                                  | Attendance for study of potential weight loss intervention using personalised behavioural / pharmacological intervention.                  | Attendance for study of potential weight loss intervention using a whole-diet approach with energy restriction.                        |
| Entry criteria – BMI kg/m <sup>2</sup>   | ≥18.5 kg/m <sup>2</sup>                                                                                                                    | ≥25 kg/m <sup>2</sup>                                                                                                                      | ≥25 kg/m <sup>2</sup>                                                                                                                  |
| Entry criteria – age years               | ≥18                                                                                                                                        | ≥18                                                                                                                                        | ≥18                                                                                                                                    |
| Entry criteria – health status           | Healthy people or people with type 2 diabetes. Severe psychiatric or physical comorbidities excluded. Previous bariatric surgery excluded. | Healthy people or people with type 2 diabetes. Severe psychiatric or physical comorbidities excluded. Previous bariatric surgery excluded. | Gestational diabetes diagnosed; severe psychiatric or physical comorbidities excluded. Previous bariatric surgery excluded.            |
| Nature of baseline visit                 | Fasting                                                                                                                                    | Fasting                                                                                                                                    | Non-fasting                                                                                                                            |
| Nature of eating behaviour questionnaire | TFEQ-R18                                                                                                                                   | TFEQ-R18                                                                                                                                   | TFEQ-R18                                                                                                                               |
| Time period                              | 2014                                                                                                                                       | 2014–2016                                                                                                                                  | 2019–2022                                                                                                                              |
| Recruitment                              | Single centre study; local recruitment through advertising at hospital/University sites; Cambridge, UK                                     | Multi-centre study; recruitment from advertising in Glasgow, Manchester and London, UK                                                     | Multi-centre study; recruitment from outpatient clinics in seven public hospital sites in the East of England, including Cambridge, UK |
|                                          |                                                                                                                                            |                                                                                                                                            |                                                                                                                                        |
| <b>Baseline Characteristics</b>          | <i>n</i> = 57                                                                                                                              | <i>n</i> = 191                                                                                                                             | <i>n</i> = 200                                                                                                                         |
| % Female                                 | 31/57 (54.4)                                                                                                                               | 150/191 (78.5)                                                                                                                             | 200/200 (100.0)                                                                                                                        |
| BMI kg/m <sup>2</sup>                    | 25.8 (4.9)                                                                                                                                 | 38.9 (7.1)                                                                                                                                 | 34.2 (6.2) at study entry.                                                                                                             |
| Age years                                | 36.3 (14.0)                                                                                                                                | 41.8 (12.5)                                                                                                                                | 32.6 (4.8)                                                                                                                             |
| Pregnant at study enrolment              | 0 (0.0)                                                                                                                                    | 0 (0.0)                                                                                                                                    | 200/200 (100.0)                                                                                                                        |
| Gestational age at diagnosis weeks       | NA                                                                                                                                         | NA                                                                                                                                         | 23.0 (7.2)                                                                                                                             |
| Gestational age at study enrolment weeks | NA                                                                                                                                         | NA                                                                                                                                         | 29.7 (2.4)                                                                                                                             |
| Normal glucose tolerance                 | 43/57 (75.4)                                                                                                                               | 174/191 (91.1)                                                                                                                             | 0 (0.0)                                                                                                                                |
| Pre-diabetes                             | 6/57 (10.5)                                                                                                                                | 11/191 (5.8)                                                                                                                               | 0 (0.0)                                                                                                                                |
| Type 2 diabetes                          | 8/57 (14.0)                                                                                                                                | 6/191 (3.1)                                                                                                                                | 0 (0.0)                                                                                                                                |
| Gestational diabetes                     | 0 (0.0)                                                                                                                                    | 0 (0.0)                                                                                                                                    | 200/200 (100.0)                                                                                                                        |
